# Supplementary material for: Progress towards rubella elimination after implementation of rubella immunization for over 20 years in Shandong province, China
Source: PubMed Central journal article supplement (PMC5740145; doi:10.1038/s41598-017-18281-2), 2017-12-21
Supplement: 41598_2017_18281_MOESM1_ESM.pdf [file 41598_2017_18281_MOESM1_ESM.pdf]

**Progress towards rubella elimination after implementation of  
rubella immunization for over 20 years in Shandong province,  
China**

Changyin Wang<sup>1+</sup>, Zhen Zhu<sup>2+</sup>, Qing Xu<sup>1</sup>, Xueqiang Fang<sup>1</sup>, Xiaodong Liu<sup>1</sup>, Ping

Xiong<sup>1</sup>, Lizhi Song<sup>1</sup>, Wenbo Xu<sup>2,3\*</sup>, and Aiqiang Xu<sup>1\*</sup>

**Supplementary Table 1. Information about the migration children in Shandong province during 2009-2015.**

| City      | 2009  | 2010  | 2011   | 2012   | 2013   | 2014   | 2015  |
|-----------|-------|-------|--------|--------|--------|--------|-------|
| Jinan     | 9696  | 12093 | 14274  | 18337  | 17822  | 25610  | 15403 |
| Qingdao   | 13617 | 17217 | 18379  | 22763  | 19080  | 24519  | 14328 |
| Zibo      | 4108  | 4276  | 4403   | 6103   | 5290   | 6612   | 4857  |
| Zaozhuang | 2824  | 2538  | 2954   | 3826   | 3961   | 3724   | 2736  |
| Dongying  | 2881  | 2771  | 3035   | 5140   | 4009   | 5590   | 3469  |
| yantai    | 5700  | 6606  | 6693   | 9562   | 8987   | 13575  | 7114  |
| Weifang   | 5100  | 5765  | 7241   | 8996   | 8105   | 10032  | 6059  |
| Jining    | 7336  | 7649  | 7897   | 9482   | 8881   | 10025  | 5891  |
| Tai'an    | 932   | 1341  | 1390   | 2219   | 2419   | 2112   | 1224  |
| Weihai    | 3598  | 3526  | 3828   | 5244   | 4916   | 7242   | 4077  |
| Rizhao    | 2370  | 2781  | 2552   | 2749   | 2268   | 2362   | 1047  |
| Laiwu     | 837   | 803   | 1155   | 1616   | 1225   | 1102   | 640   |
| Linyi     | 10486 | 10670 | 12136  | 14818  | 13822  | 14688  | 8923  |
| Dezhou    | 2555  | 3037  | 3033   | 5319   | 5625   | 10902  | 6262  |
| Liaocheng | 8779  | 6500  | 6878   | 8700   | 6031   | 6643   | 3782  |
| Binzhou   | 2256  | 2838  | 2808   | 3691   | 3243   | 4701   | 3434  |
| Heze      | 4026  | 4302  | 5021   | 8941   | 10497  | 12763  | 9490  |
| Total     | 87101 | 94713 | 103677 | 137506 | 126181 | 162202 | 98736 |

**Supplementary Table 2. Administrative estimated RCV immunization coverage of 10 cities, where were selected for RV serosurvey study in this paper.**

| City      | 2009  |      | 2010   |       | 2011   |       | 2012   |        | 2013   |        | 2014  |        | 2015  |        |
|-----------|-------|------|--------|-------|--------|-------|--------|--------|--------|--------|-------|--------|-------|--------|
|           | RCV1  | RCV2 | RCV1   | RCV2  | RCV1   | RCV2  | RCV1   | RCV2   | RCV1   | RCV2   | RCV1  | RCV2   | RCV1  | RCV2   |
| Jinan     | 75.82 | /    | 96.41  | 66.33 | 96.17  | 92.54 | 98.78  | 103.70 | 108.88 | 106.02 | 88.00 | 97.65  | 98.68 | 106.70 |
| Qingdao   | 64.83 | /    | 95.59  | 53.14 | 93.98  | 83.74 | 97.98  | 128.37 | 100.07 | 101.47 | 89.92 | 107.77 | 98.00 | 109.22 |
| Zibo      | 83.79 | /    | 97.07  | 64.38 | 105.50 | 83.72 | 105.39 | 139.37 | 118.26 | 115.37 | 93.63 | 114.34 | 96.24 | 107.17 |
| Zaozhuang | 84.09 | /    | 95.62  | 65.13 | 101.67 | 94.12 | 109.97 | 112.73 | 73.80  | 99.76  | 96.76 | 76.01  | 92.63 | 76.70  |
| Dongying  | 77.63 | /    | 81.69  | 60.72 | 82.28  | 80.45 | 80.91  | 83.56  | 81.66  | 86.84  | 84.21 | 83.24  | 85.74 | 98.40  |
| Tai'an    | 84.95 | /    | 101.91 | 66.09 | 102.89 | 96.76 | 106.52 | 101.81 | 96.72  | 104.03 | 81.69 | 90.70  | 94.63 | 96.00  |
| Rizhao    | 68.90 | /    | 98.27  | 56.01 | 89.85  | 93.09 | 100.25 | 105.78 | 106.05 | 93.33  | 84.67 | 96.13  | 88.73 | 95.00  |
| Laiwu     | 86.27 | /    | 99.50  | 73.01 | 94.43  | 84.27 | 107.16 | 109.75 | 104.24 | 103.03 | 89.21 | 94.97  | 97.65 | 101.35 |
| Linyi     | 61.91 | /    | 97.51  | 57.56 | 90.16  | 87.58 | 106.60 | 102.65 | 102.41 | 108.22 | 89.62 | 101.88 | 96.98 | 103.08 |
| Liaocheng | 67.93 | /    | 76.57  | 47.03 | 84.53  | 81.09 | 92.37  | 83.40  | 102.57 | 92.90  | 81.34 | 83.00  | 91.33 | 108.31 |
